# Supplementary material for: Comparative Efficacy and Outcomes of Neuroendoscopy Versus Conventional Craniotomy for Intracerebral Hemorrhage: A Systematic Review AND Retrospective Cohort Study
Source: Research Square preprint supplement (doi:10.21203/rs.3.rs-6903187/v1), 2025-07-23
Supplement: Supplementary file 2 [file f8a87fbe4d350070016cc2fc.docx]

**Supplement 2 Meta-analysis of secondary outcome parameters**
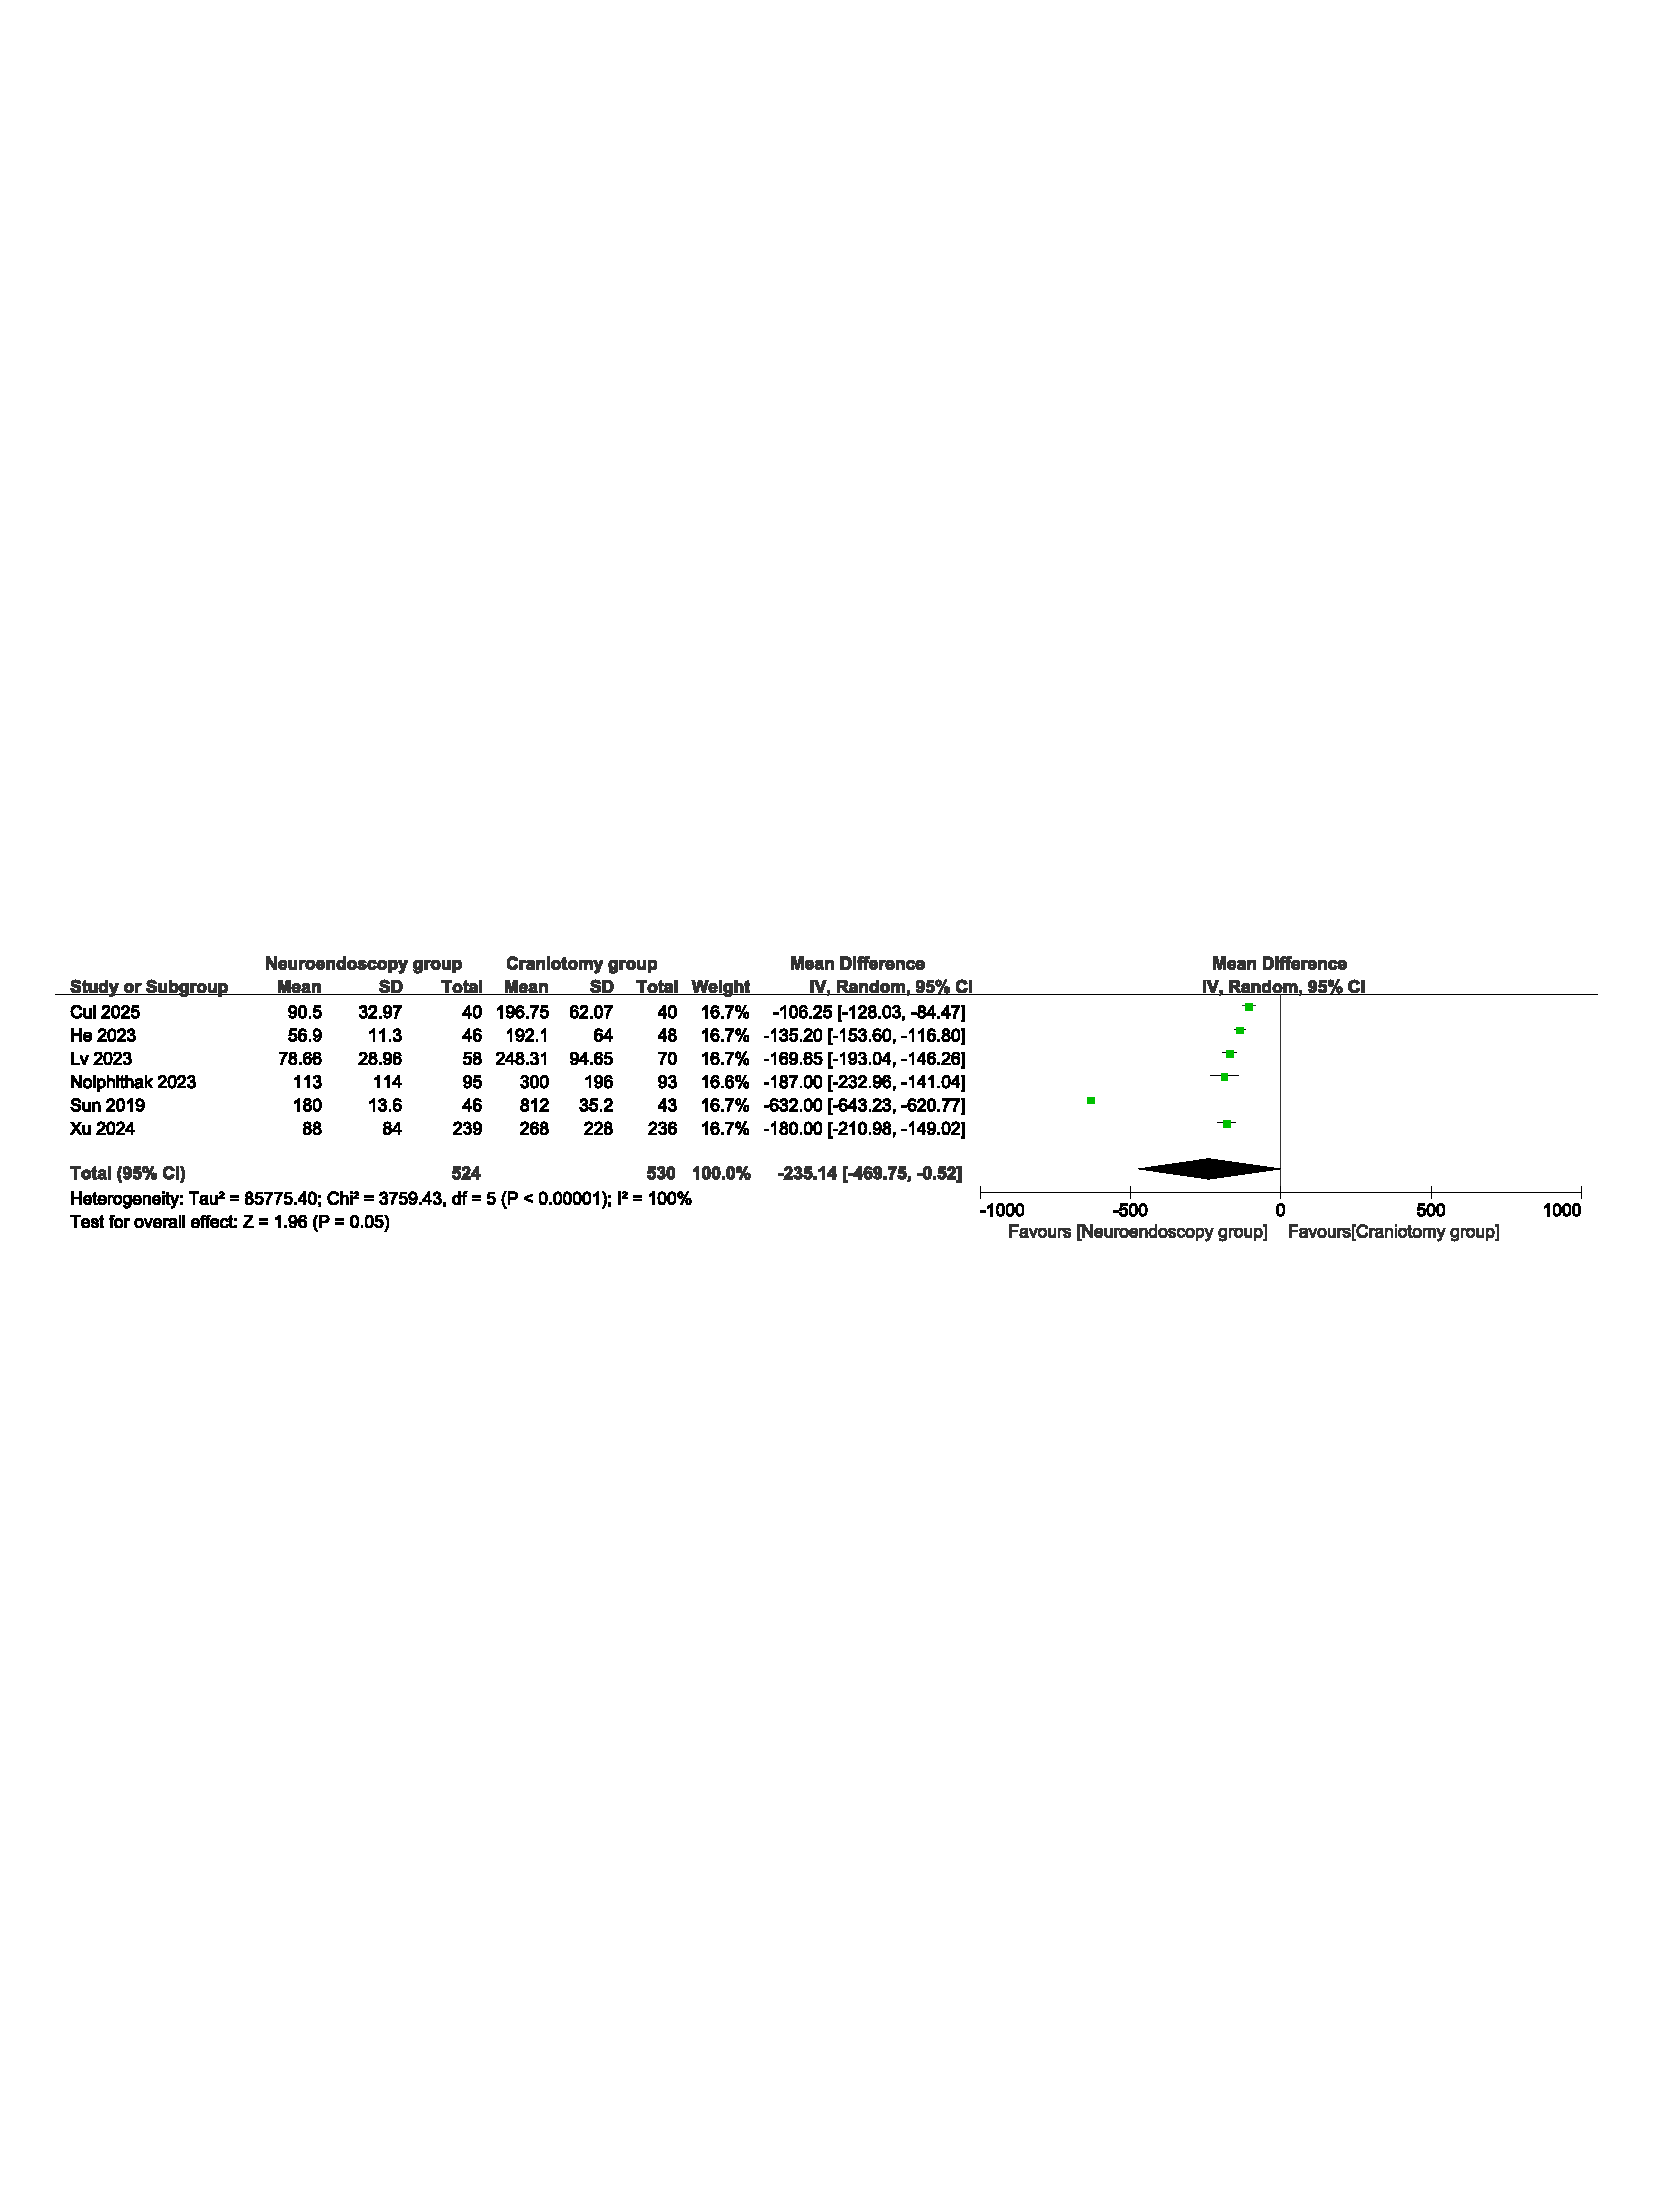


Fig 1 Forest of Blood loss. There was no significant difference in blood loss between Neuroendoscopy group and Craniotomy group. Our own research data are represented by Cui 2015.


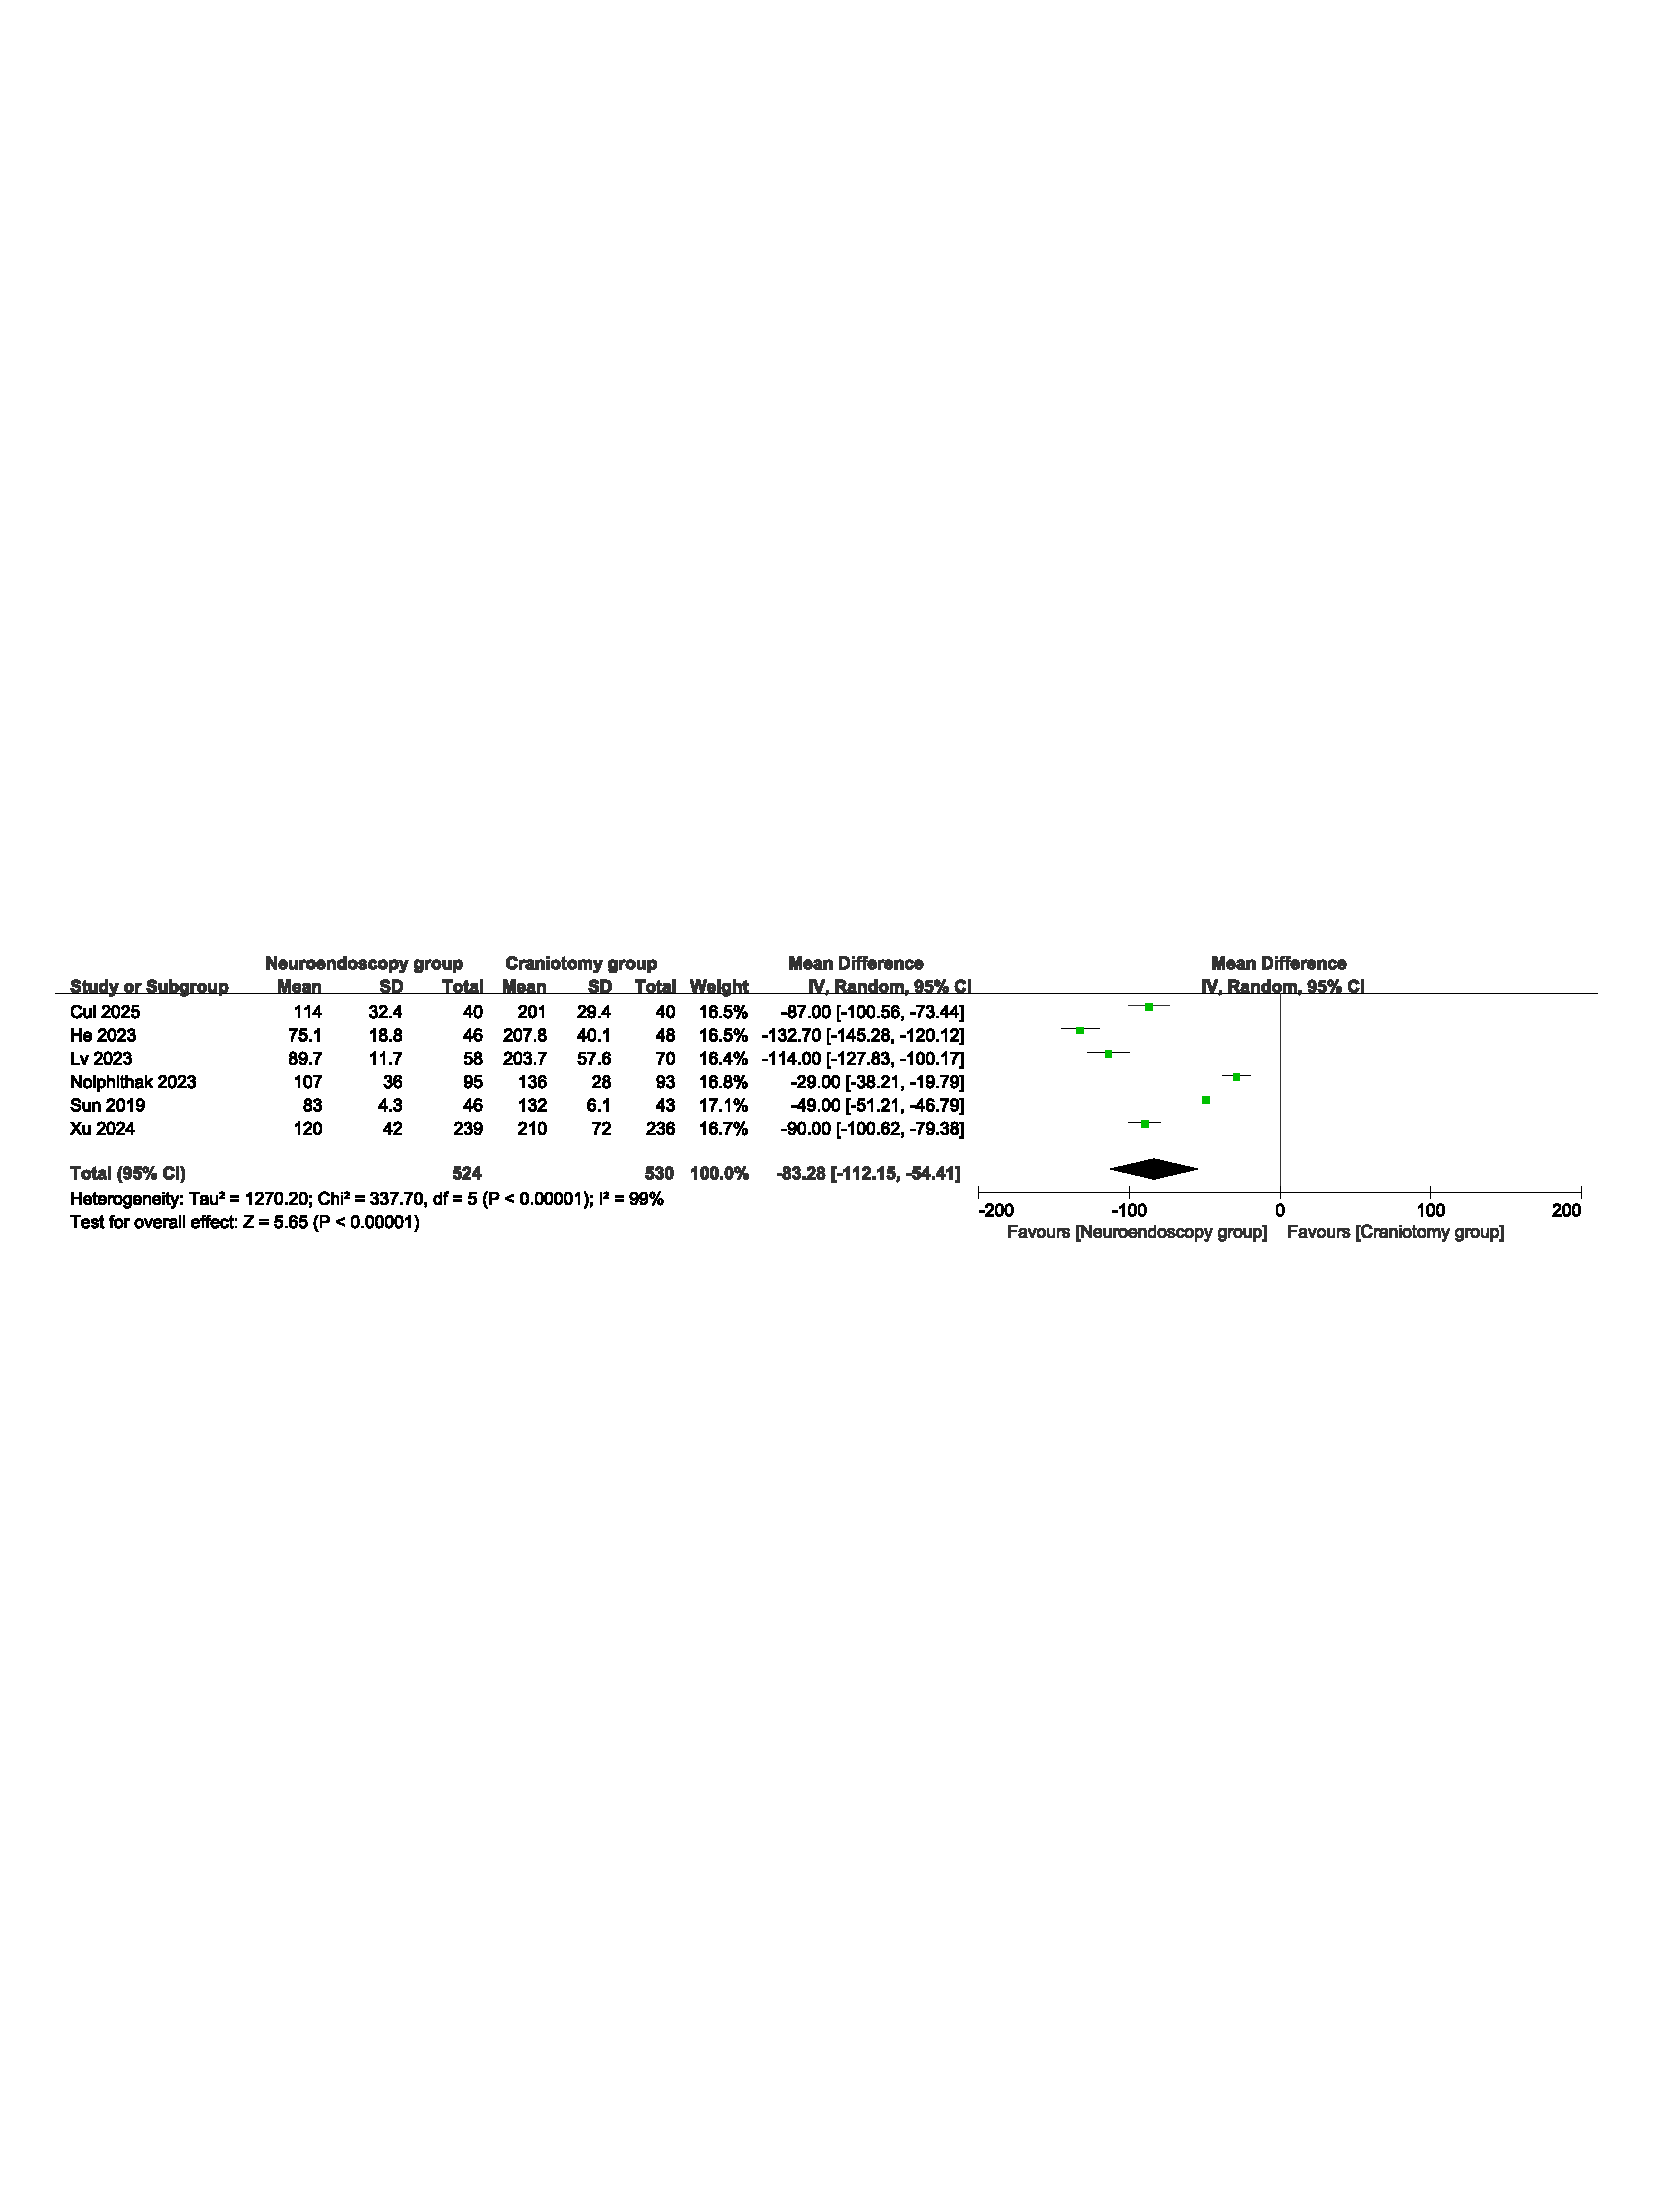


Fig 2 Forest plot of Operation time. The operation time of Neuroendoscopy group was significantly lower than that of Craniotomy group. Our own research data are represented by Cui 2015.


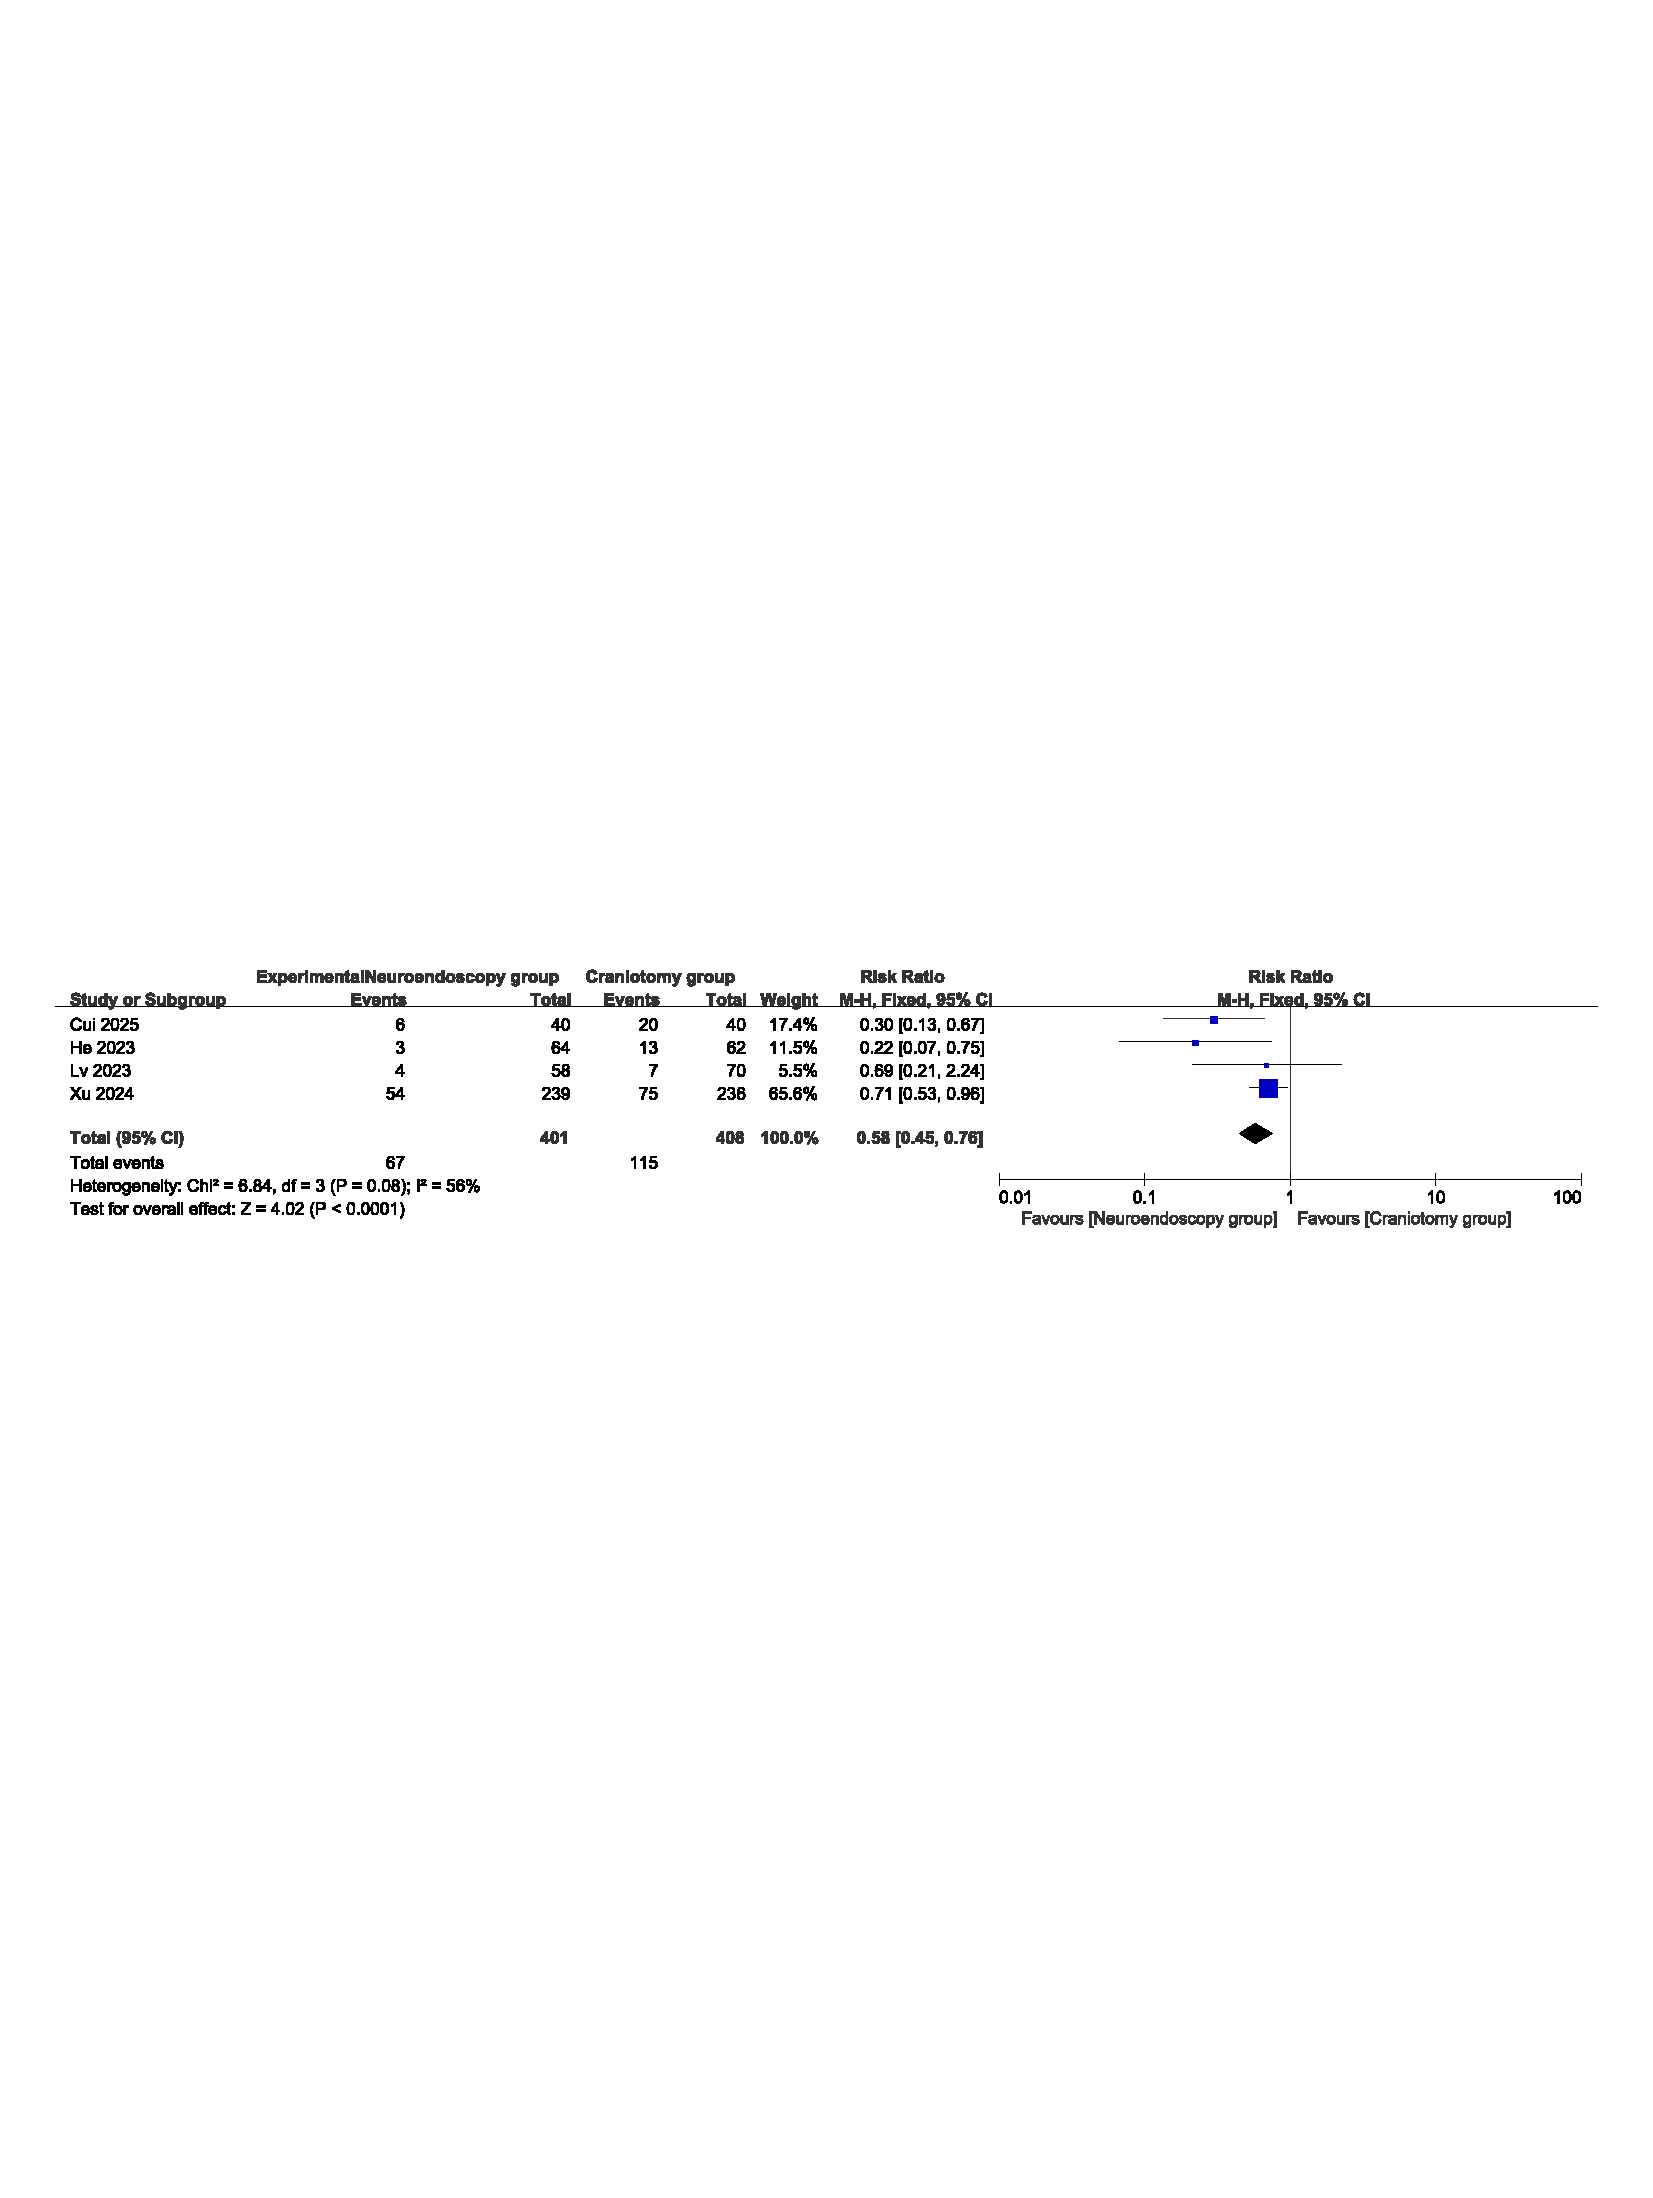


Fig 3 Forest map of Pulmonary infection. The incidence of pulmonary infection in Neuroendoscopy group was significantly lower than that in Craniotomy group. Our own research data is represented by Cui 2015.


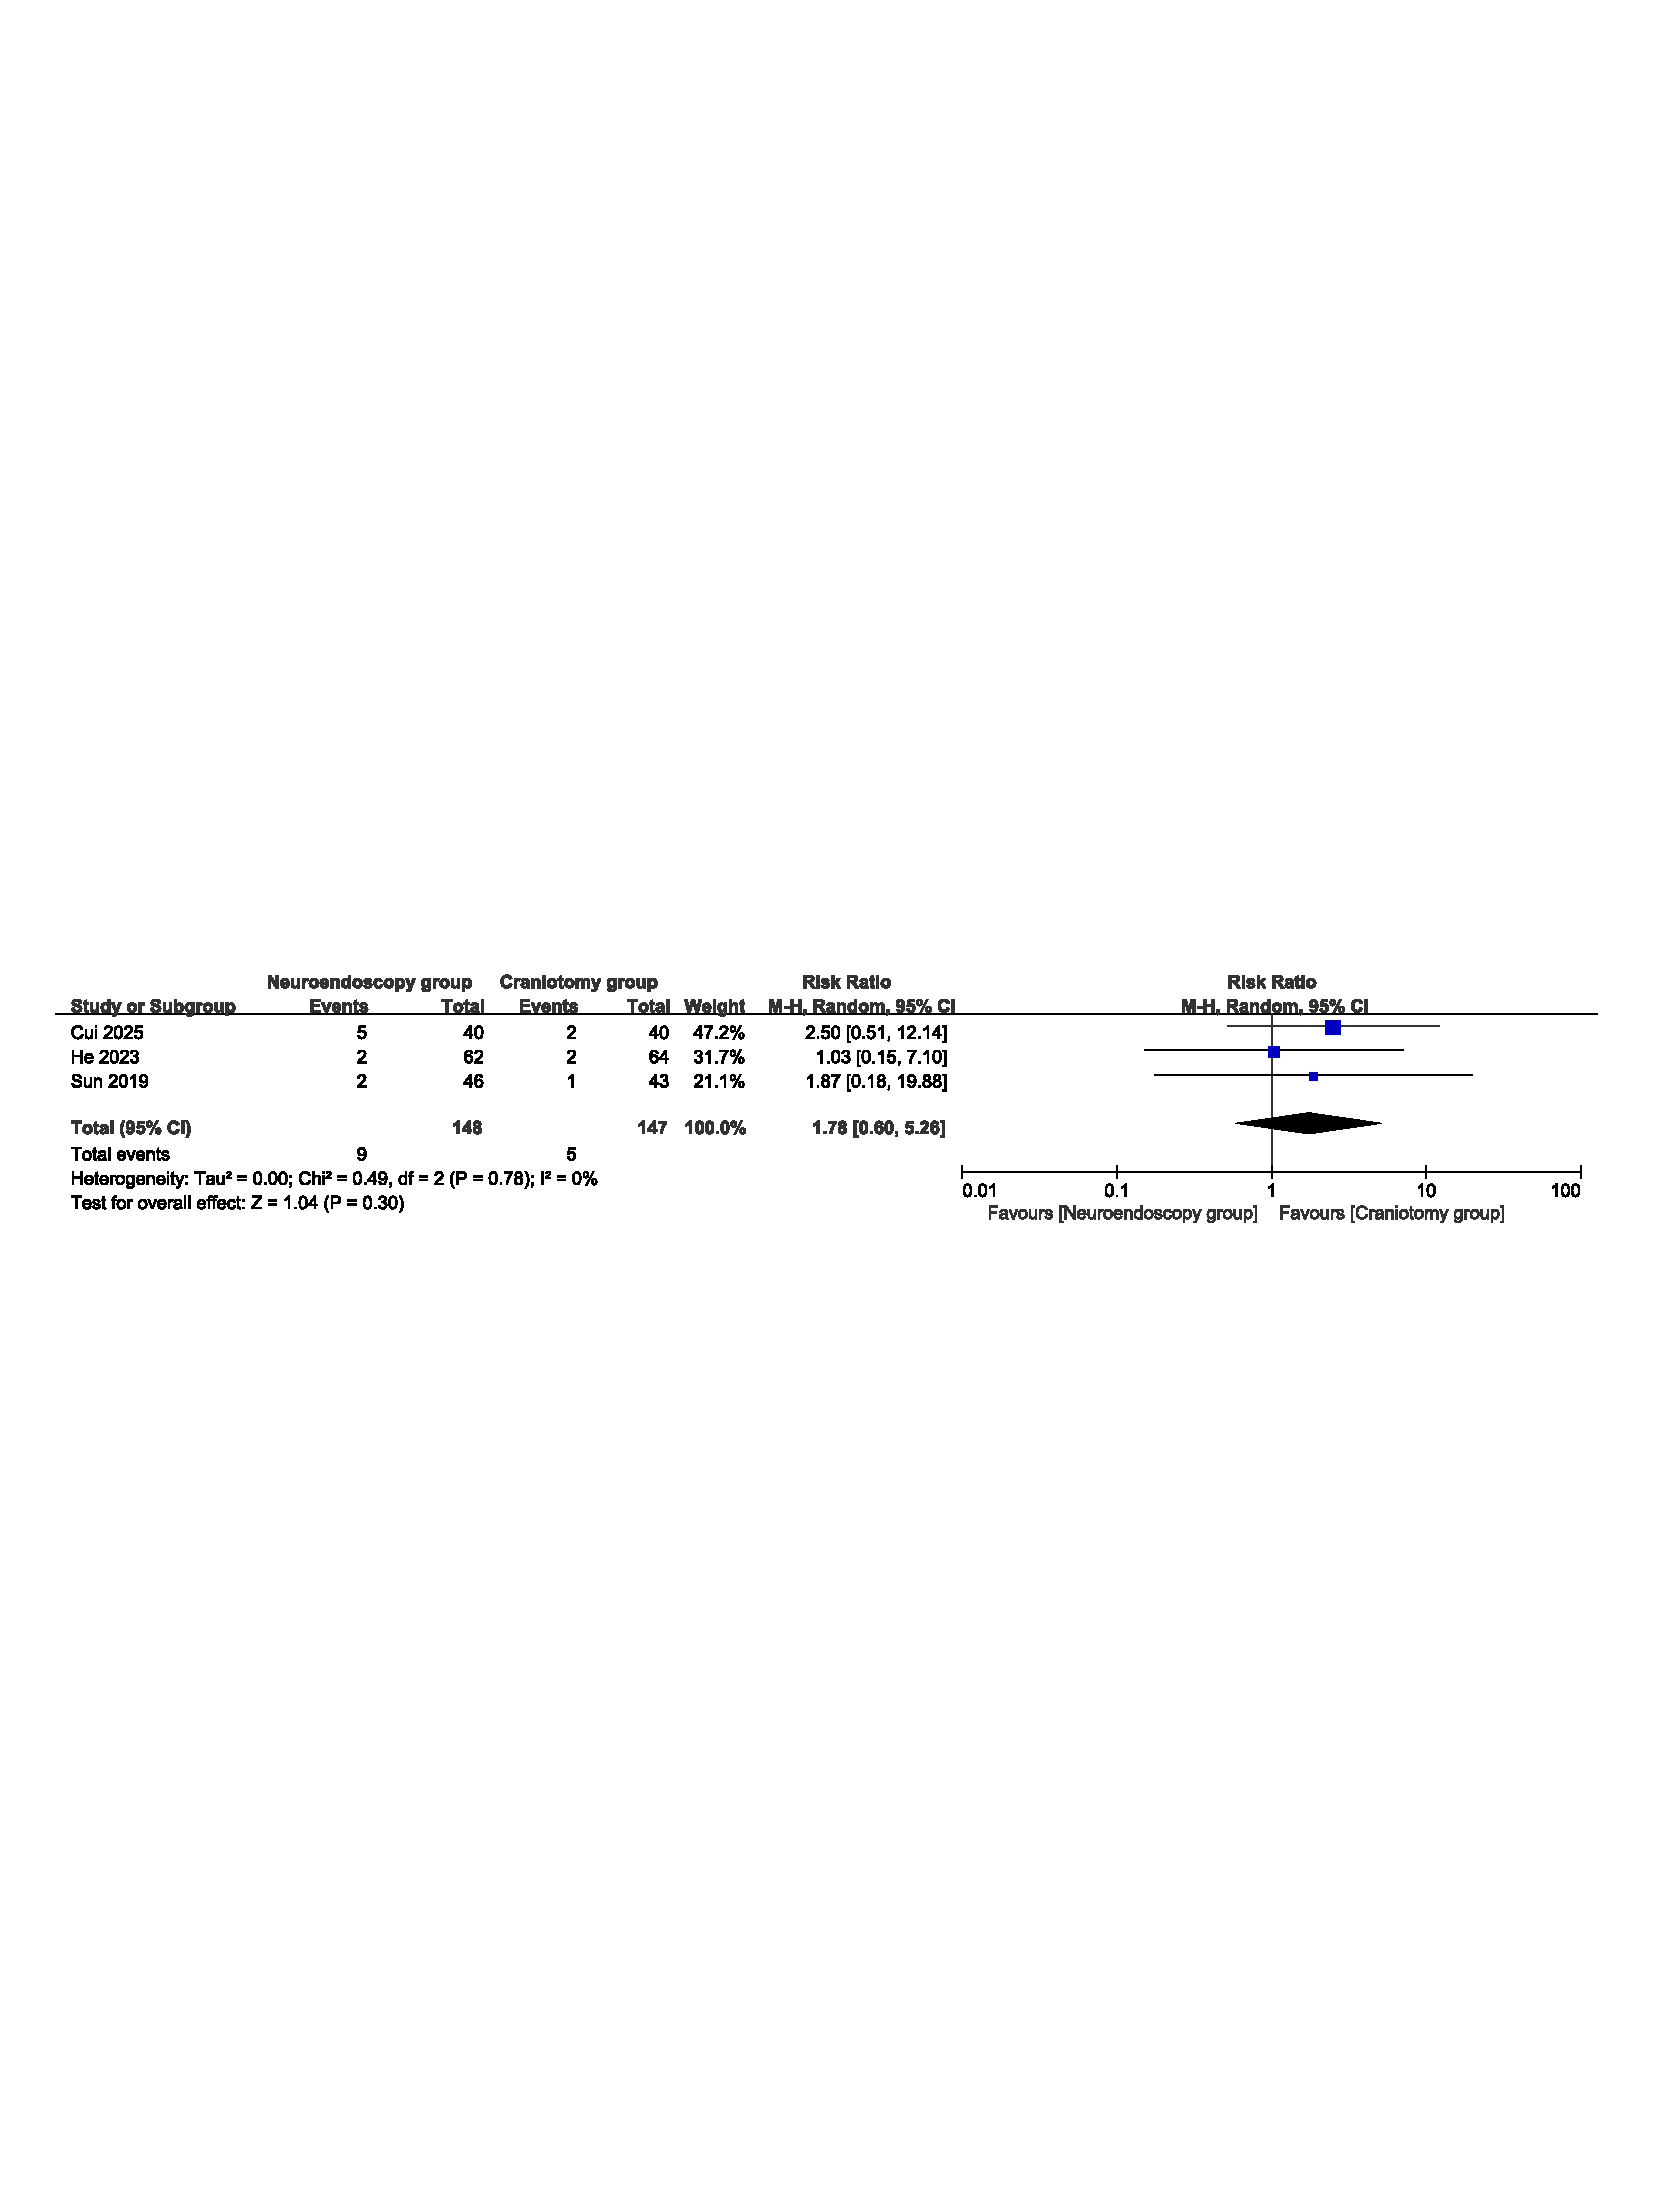


Fig 4 Secondary bleeding forest map. There was no significant difference in the incidence of secondary bleeding between the Neuroendoscopy group and the Craniotomy group. Our own research data are represented by Cui 2015.
