# Supplementary figures and images for: Comparative Efficacy and Outcomes of Neuroendoscopy Versus Conventional Craniotomy for Intracerebral Hemorrhage: A Systematic Review AND Retrospective Cohort Study
Source: Research Square preprint supplement (doi:10.21203/rs.3.rs-6903187/v1), 2025-07-23

Supplemental 1
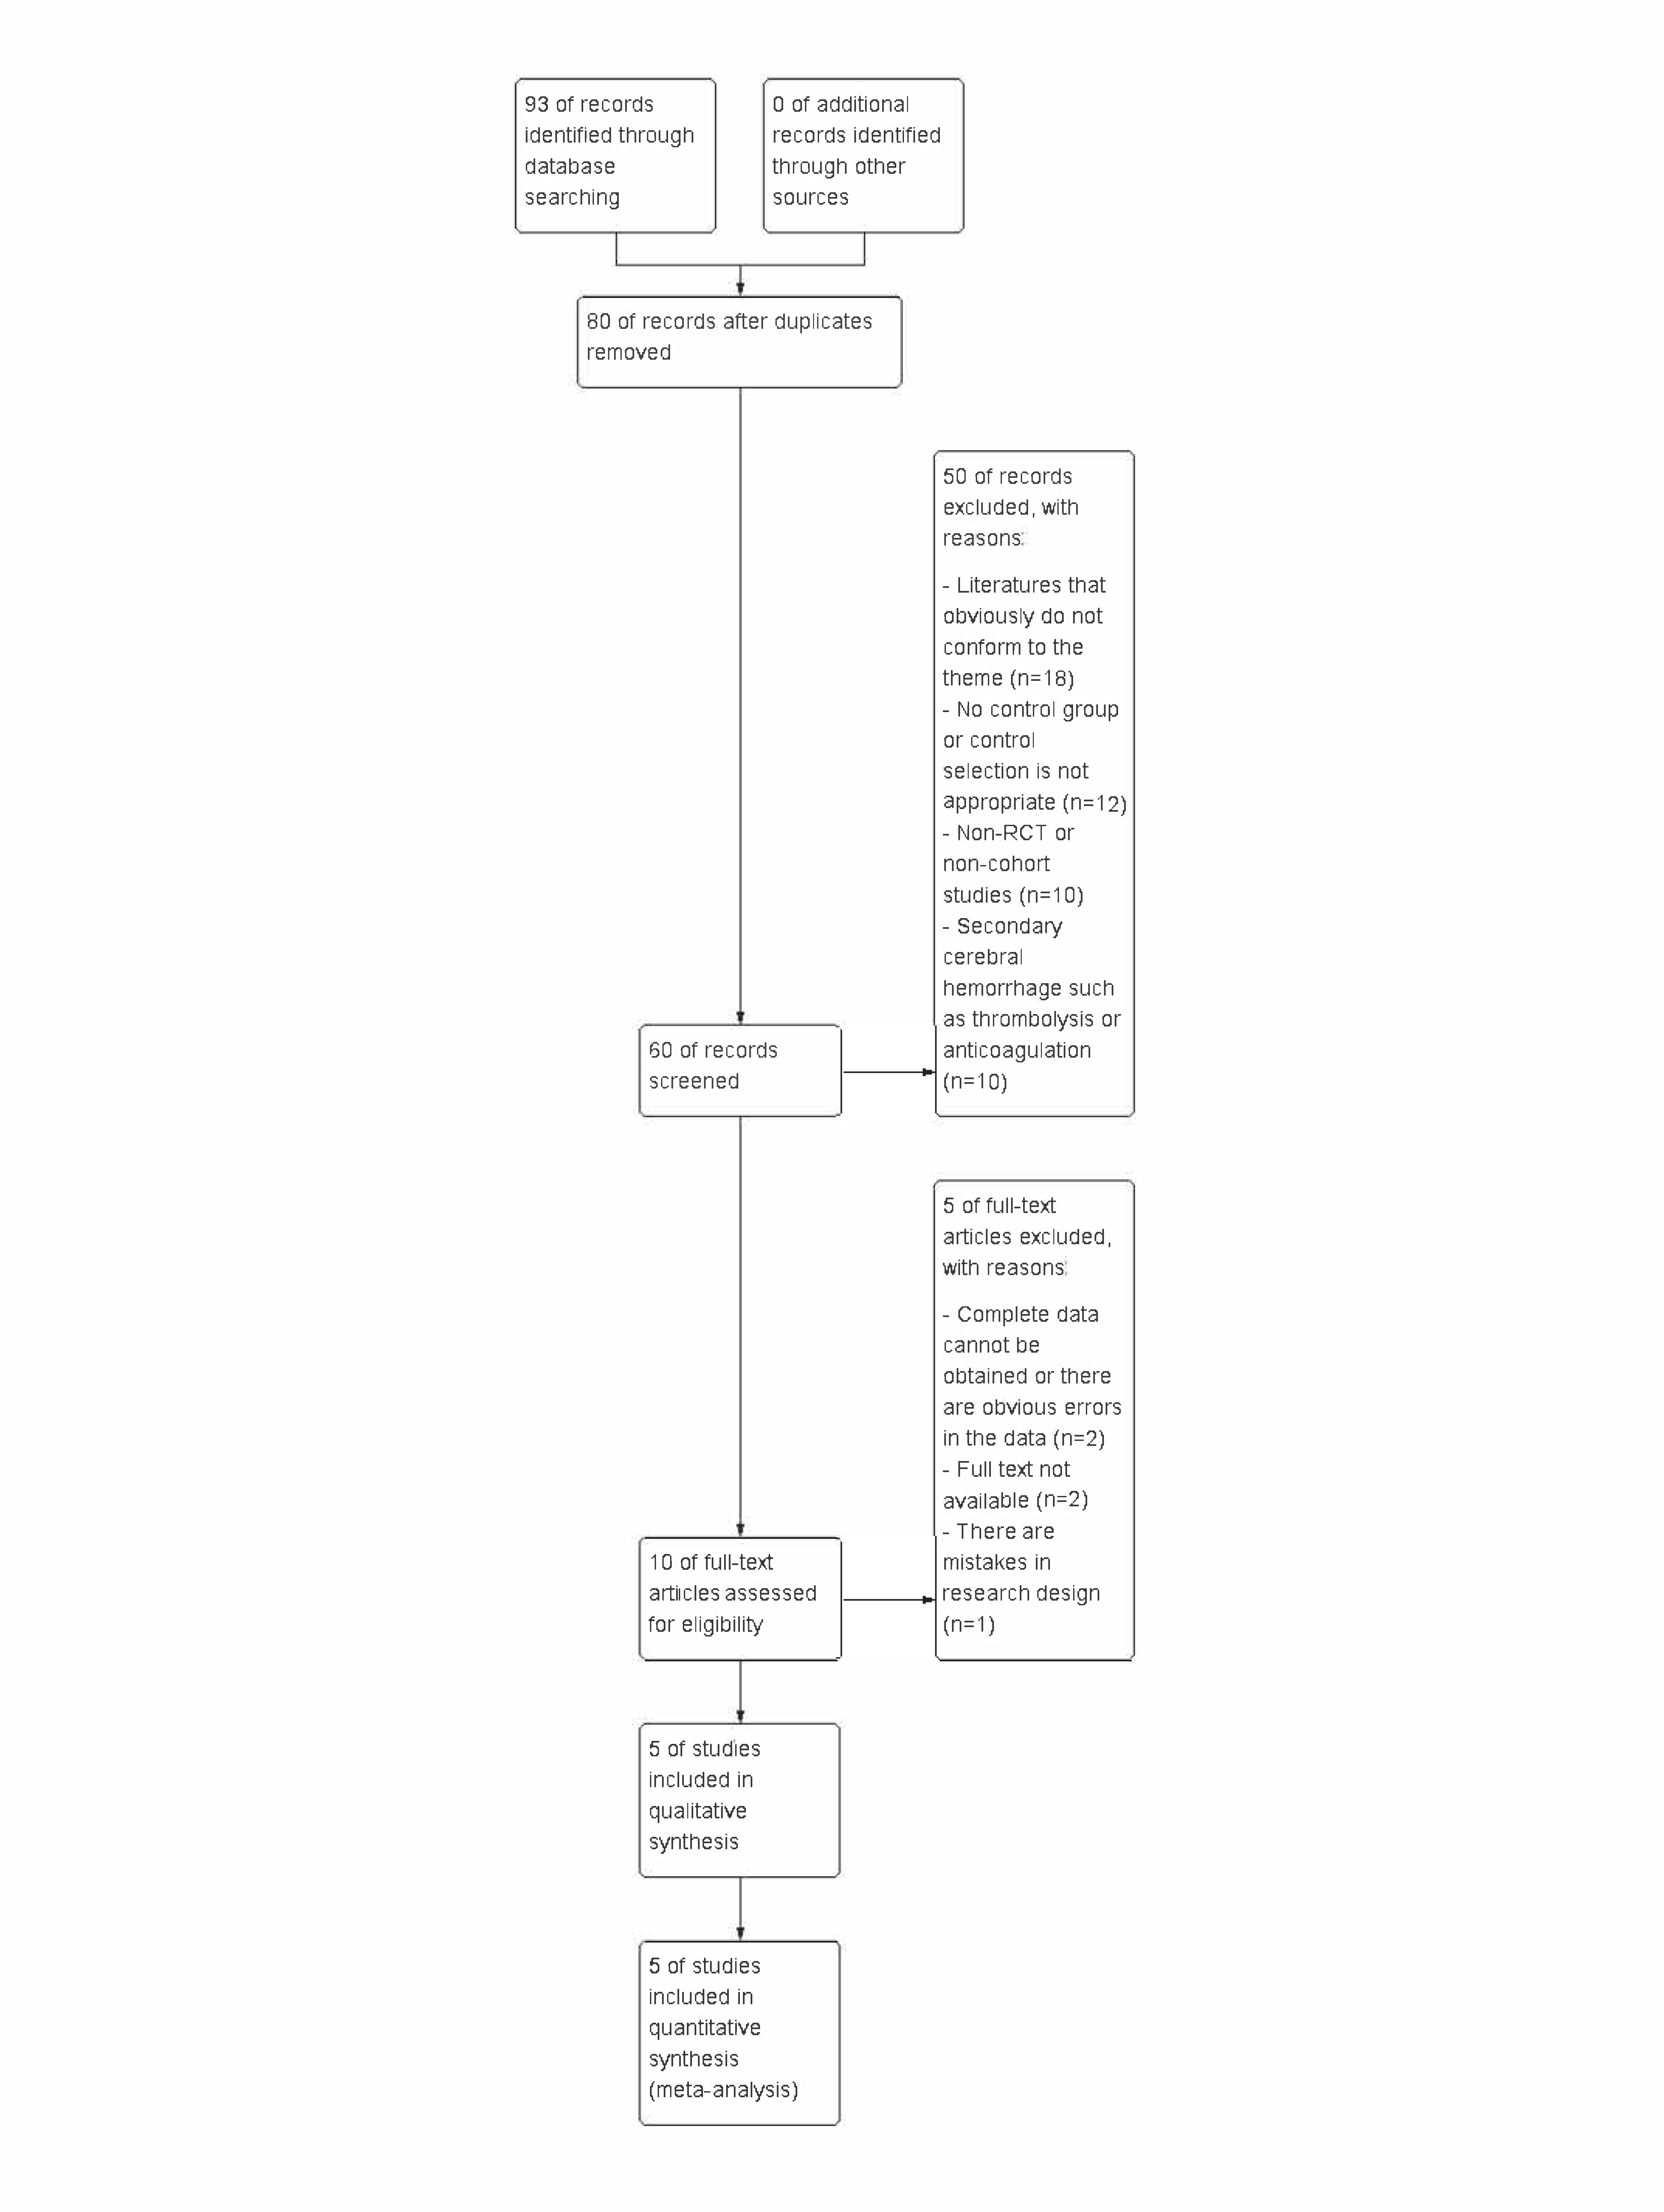


Fig 1: Identify the flow chart of qualified research.

Supplement: Supplementary file 1 [file 27b17c793de5b37c1b9931c2.docx]
